1 **Interspecific plant competition mediates the metabolic and ecological**  
2 **signature of a plant-herbivore interaction under warming and elevated**  
3 **CO<sub>2</sub>**

4 Helena Van De Velde<sup>1,2 †</sup>, Hamada AbdElgawad<sup>3,4 †</sup>, Han Asard<sup>3</sup>, Gerrit T. S. Beemster<sup>3</sup>,  
5 Samy Selim<sup>5</sup>, Ivan Nijs<sup>2</sup> and Dries Bonte<sup>1\*</sup>

6

7 *<sup>1</sup>Terrestrial Ecology Unit, Department of Biology, Ghent University, K.L. Ledeganckstraat*  
8 *35, B-9000 Ghent, Belgium*

9 *<sup>2</sup>Centre of Excellence Plants and Ecosystems, Department of Biology, University of Antwerp,*  
10 *Universiteitsplein 1, B-2610 Wilrijk, Belgium*

11 *<sup>3</sup>Integrated Molecular Plant Physiology Research Group (IMPRES), Department of Biology,*  
12 *University of Antwerp, Groenenborgerlaan 171, B-2020 Antwerp, Belgium*

13 *<sup>4</sup>Department of Botany and Microbiology, Faculty of Science, University of Beni-Suef, Beni-*  
14 *Suef 62511, Egypt.*

15 *<sup>5</sup>Department of Clinical Laboratory Sciences, College of Applied Medical Sciences, Aljouf*  
16 *university, Sakaka, P.O. 2014, Saudi Arabia*

17

18 † joint first author

19 \*Corresponding author

20 Tel.: +32 (0)9 264 52 13

21 E-mail address: [dries.bonte@ugent.be](mailto:dries.bonte@ugent.be)

22 Email addresses other authors: [helena.vd.velde@gmail.com](mailto:helena.vd.velde@gmail.com); [han.asard@uantwerpen.be](mailto:han.asard@uantwerpen.be),

23 [ivan.nijs@uantwerpen.be](mailto:ivan.nijs@uantwerpen.be), [Gerrit.beemster@uantwerpen.be](mailto:Gerrit.beemster@uantwerpen.be),

24 [Hamada.AbdElgawad@uantwerpen.be](mailto:Hamada.AbdElgawad@uantwerpen.be), [sabdulsalam@ju.edu.sa](mailto:sabdulsalam@ju.edu.sa)

## 25 Abstract

- 26 1. Biotic interactions shape community evolution, but we lack mechanistic insights on  
27 how metabolic and ecological processes under climate change are altered by biotic  
28 interactions.
- 29 2. We used a two-trophic model community consisting of the aphid *Dysaphis*  
30 *plantaginea* feeding on the forb *Plantago lanceolata*, and a grass competitor *Lolium*  
31 *perenne* that does not experience herbivory by the aphid. Monocultures and mixtures  
32 were exposed to the herbivory treatment and to three relevant simulated environmental  
33 changes as prevalent under current climate change (increased temperature, CO<sub>2</sub>, and  
34 increased temperature and CO<sub>2</sub>)
- 35 3. Elevated CO<sub>2</sub> reduced the nitrogen content of *P. lanceolata*, while simultaneous  
36 increases of CO<sub>2</sub> and temperature modified the plant metabolic component and the  
37 magnitude of these responses in different directions. Elevated CO<sub>2</sub> enhanced defence  
38 systems in *P. lanceolata*, but these effects were not altered by warming. Interspecific  
39 plant competition did, however, neutralise these responses. There were no indications  
40 for indirect effects of climate on aphid population growth as mediated by changes in  
41 plant defence, nutritional quality or biomass.
- 42 4. We thus demonstrate interactions between abiotic and biotic processes on plant  
43 metabolite profiles, but more importantly, that climate change effect on a selection of  
44 the metabolic pathways are altered by herbivory and competition. Our experiment  
45 under semi-natural conditions thus demonstrates the non-additive and often  
46 neutralizing effects of biotic interactions on plant metabolism and species performance  
47 under climate-associated environmental change.

## 48 **Introduction**

49 Interactions between insect herbivores and host plants are influenced by primary and  
50 secondary metabolites. The concentrations and types of these molecules in plants is likely  
51 affected by climate change (Bidart-Bouzat & Imeh-Nathaniel, 2008; Zvereva & Kozlov,  
52 2006). For example, plants exposed to elevated CO<sub>2</sub> show higher concentrations of many  
53 organic molecules, including carbohydrates (fertilization effect), but generally lower or  
54 unaltered nitrogen levels, and consequently higher C:N ratios (Bezemer & Jones, 1998;  
55 Lincoln *et al.*, 1993; Robinson *et al.*, 2012; Stiling & Cornelissen, 2007). Lower nitrogen  
56 concentrations imply lower levels of leaf protein and amino acids and reduced nutritive value  
57 for herbivores (Lincoln *et al.*, 1986). Consequently, the performance of insects generally  
58 reduces under high CO<sub>2</sub> (Bezemer & Jones, 1998; Hunter, 2001; Lincoln *et al.*, 1993).  
59 Contrary to elevated CO<sub>2</sub>, moderate warming has positive effects on insect herbivore  
60 performance by reducing development time (Bale *et al.*, 2002; Van De Velde *et al.*, 2016) and  
61 increasing fecundity (Meisner *et al.*, 2014). Climate change may thus paradoxically constrain  
62 rather than facilitate insect herbivore population growth by lowering plant quality (Bauerfeind  
63 & Fischer, 2013; Jamieson *et al.*, 2015). These resource-quality mediated effects are,  
64 however, anticipated to not fully counterbalance the direct effects of warming on  
65 development, rendering the overall herbivore response to warming positive (Bauerfeind &  
66 Fischer, 2013; Zvereva & Kozlov, 2006).

67

68 Secondary metabolites (e.g. lignin, tannins, phenolics and terpenoids), greatly affect tissue  
69 quality by determining the nutritive value, palatability, digestibility and/or toxicity of foliage  
70 (see Table 1 for a synthesis). Compared to primary metabolites, responses of secondary  
71 metabolites to elevated CO<sub>2</sub> and warming are more variable and less understood (Bidart-  
72 Bouzat & Imeh-Nathaniel, 2008; Robinson *et al.*, 2012). According to the carbon-nutrient

73 balance hypothesis (Bryant *et al.*, 1983), elevated CO<sub>2</sub> is expected to increase secondary  
74 metabolite levels as a result of the ‘excess’ carbon (fertilizing). Yet, because of the relatively  
75 lower N-availability, the increase of nitrogen-containing metabolites will be lower than  
76 expected (Robinson *et al.*, 2012). On the other hand, trade-offs between growth and  
77 secondary metabolisms are anticipated to promote primary metabolic activity under  
78 warming and therefore favour photosynthesis and growth relative to defence. This  
79 expectation corresponds to the growth-differentiation balance hypothesis (Herms & Mattson,  
80 1992). The different components associated with climate change thus induce direct, and often  
81 orthogonal responses in chemical defences (Bidart-Bouzat & Imeh-Nathaniel, 2008; Zavala *et*  
82 *al.*, 2013; Zvereva & Kozlov, 2006).

83

84 Biotic interactions have a strong impact on life histories and physiology of species, and these  
85 interactions may shift responses of plants towards climate change (Van de Velde *et al.* 2016).  
86 Competition for limited nutrients for example, enhances the availability of carbon in a focal  
87 plant relative to its demand. This, in turn, can increase carbon-based defences and thus reduce  
88 herbivory compared with plants that are less constrained by competitors (Bryant *et al.*, 1983).  
89 Also the identity of a neighbouring plant may affect the resistance of a focal plant by a  
90 different outcome of the plant-plant competition (Barton & Bowers, 2006; Broz *et al.*, 2010).  
91 Conspecific competition, in particular, may result in stronger decline of plant growth and  
92 increased defence compared to heterospecific competition. Indeed, Broz *et al.* (2010) for  
93 instance showed that focal plants with conspecific neighbours allocated more resources  
94 towards production of carbon-based defence molecules, whereas those grown with  
95 heterospecific neighbours allocated more resources towards growth. Hence, elevated CO<sub>2</sub> as  
96 well as warming is anticipated to indirectly affect the defence of a focal plant, through species  
97 specific stimulation of plant growth and thus plant-plant competition.

98 Although atmospheric CO<sub>2</sub> and temperature increase concurrently, empirical studies  
99 investigating their combined effect on multi-trophic communities are surprisingly scarce and  
100 insufficient to effectively guide theory or synthesis (Cornelissen, 2011; Dyer et al. 2013;  
101 Zvereva & Kozlov, 2006). The current study therefore investigates effects of elevated CO<sub>2</sub> as  
102 well as combined effects of elevated CO<sub>2</sub> and warming on a simple model community  
103 consisting of three species: rosy apple aphid *Dysaphis plantaginea* Passerini (*Hemiptera*:  
104 *Aphididae*) feeding on plantain, *Plantago lanceolata* L., and a heterospecific neighboring  
105 plant species, perennial ryegrass, *Lolium perenne* L. The aphid does not feed on *L. perenne*.  
106 The experimental design consisted of monocultures of *P. lanceolata* and mixtures of *L.*  
107 *perenne* and *P. lanceolata* exposed to the two aforementioned simulated climate scenarios as  
108 well as to a control scenario with the current climate. As the experiments were conducted  
109 outdoors, we were also able to *post-hoc* study how the imposed climatic and competition  
110 treatments affected mildew infections. Biotrophic parasites such as mildew extract nutrients  
111 from living cells and have extended periods of physiological interaction with their hosts  
112 (Agrios, 2005). Elevated CO<sub>2</sub> and warming have been shown to affect the severity of  
113 pathogen infections (Mikkelsen *et al.*, 2015, Thomas & Blanford, 2003). We took advantage  
114 of this unplanned infestation to study the impact of elevated CO<sub>2</sub> and warming on mildew  
115 infestation and the putative additive effects of mildew infestation on plant-insect herbivore  
116 interaction.

117

118 Based on the above, we anticipate that elevated CO<sub>2</sub> and warming will alter foliar nutrients  
119 and defence molecules, that altered host quality and plant resistance will affect insect  
120 herbivore performance, and that elevated CO<sub>2</sub> and warming should indirectly influence host  
121 quality and plant resistance via effects on neighbouring plants. We predict investments in  
122 defence to be higher under conspecific competition relative to heterospecific competition

123 because of increased resource competition. In addition, increased CO<sub>2</sub> is anticipated to  
124 increase chemical defence by promoting the production of secondary metabolites, while  
125 simultaneously increased temperature would in contrast promote plant growth. Depending on  
126 the relative rates of these physiological changes, net impact on herbivore populations may  
127 either remain constant, decline or increase if defence is respectively proportionally promoted  
128 or constrained relative to metabolism.

129

130 We do, however, aim to move beyond this generic perspective and to acquire a deep  
131 mechanistic understanding of the changing ecological interactions under elevated CO<sub>2</sub> and  
132 warming. To this end, we selected metabolites and groups of metabolites as molecular  
133 markers to evaluate defences and stress levels (see Table 1). In particular, we quantified an  
134 indicator of oxidative cellular damage (lipid peroxidation). Oxidative stress in plants is  
135 commonly induced under abiotic stress, but also by herbivory (Wu & Baldwin, 2010).  
136 Elevated CO<sub>2</sub> on the other hand, often reduces abiotic stress impact (Zinta et al. 2018).  
137 Herbivory damage also induces the production of secondary metabolites associated with the  
138 salicylic acid and jasmonic acid pathway (Kuśnierczyk *et al.*, 2011; Morkunas & Gabryś,  
139 2011). Therefore, as an indicator of plant-insect interaction, jasmonic acid levels were  
140 determined. Simultaneously with the stress status, we evaluated the plant capacity to defend  
141 itself by quantifying protective metabolites. Here we determined molecular antioxidants  
142 (tocopherols, antioxidant capacity, carotenoids, proline) providing protection against  
143 oxidative stress (Gómez-Ariza *et al.*, 2007, Peshev *et al.*, 2013). We also quantified several  
144 groups of molecules that contribute to defence against insects (glycosides, tannins, lignin).  
145 Finally, elevated CO<sub>2</sub> as well as elevated temperature are known to affect stomatal aperture  
146 and therefore water transport. To evaluate the plant response to its water status we quantified  
147 osmolytes (proline, soluble sugars). Increase in these molecules reduces the cellular water

148 potential, improving water uptake. Given the anticipated complex interplay between elevated  
 149 CO<sub>2</sub>, temperature and competition, we performed a multivariate grouping analysis to  
 150 document concerted responses in the quantified metabolites.

151

152 Table 1: Overview of molecular markers determined in this study and their principal function.

| <b>METABOLITE</b>                                  | <b>PRINCIPAL FUNCTION</b> | <b>FUNCTION DESCRIPTION</b>                                                                                                                                                                                                     | <b>REF.</b>                  |
|----------------------------------------------------|---------------------------|---------------------------------------------------------------------------------------------------------------------------------------------------------------------------------------------------------------------------------|------------------------------|
| <b>TOCOPHEROL (VITAMINE E)</b>                     | Lipophilic antioxidant    | Components of biological membranes; act as scavengers of oxygen radicals generated by stress, in particular singlet oxygen. Tocopherols also stabilize membrane structures.                                                     | Blokhina et al (2003)        |
| <b>CAROTENOIDS</b>                                 | Lipophilic antioxidant    | Lipophilic antioxidants localized in plastids of photosynthetic and non-photosynthetic plant tissues. Carotenoids react with lipid peroxidation products to end the chain reactions and dissipate the excess excitation energy. | Bartley and Scolnik (1995)   |
| <b>PHENOLICS/ FLAVONOIDS</b>                       | Antioxidant               | Polyphenols have free radical scavenging activity and are involved in hydrogen peroxide neutralization. Flavonoids are also secondary ROS scavenging molecules in plants under excess excitation.                               | Blokhina et al (2003)        |
| <b>TOTAL ANTIOXIDANT CAPACITY (TAC)</b>            |                           | Total antioxidant capacity (TAC) is the measure of the gross capacity of a plant extract to scavenge reactive oxygen species.                                                                                                   | Das and Roychoudhury (2014)  |
| <b>MALONDIALDEHYDE, (MDA)</b>                      | Lipid peroxidation marker | Oxidative stress induces lipid peroxidation disrupting membrane functions. Lipid peroxidation products (MDA) indicate membrane oxidation levels.                                                                                | Das and Roychoudhury (2014)  |
| <b>SOLUBLE SUGARS (GLUCOSE, SUCROSE, FRUCTOSE)</b> | Osmolytes                 | Soluble sugars protect plant cells through osmoregulation, improving water uptake and retention, and may impact cellular membranes through interaction with the lipid bilayer.                                                  | Shao et al., (2006)          |
| <b>PROLINE</b>                                     | Osmolytes/ antioxidant    | Proline is an osmolyte, contributing to water uptake, as well as an antioxidant.                                                                                                                                                | Szabados and Savoure (2010). |
| <b>GLYCOSIDES: CATAPOL, AUCUBIN</b>                | Biotic stress defence     | Secondary metabolites that help repelling herbivores, protects plant from UV and contributes to control of competitive interactions between plants.                                                                             | Bowers (1991).               |
| <b>TANNINS</b>                                     | Biotic stress defence     | Tannins are astringent bitter polyphenols and act as feeding deterrents to many insect pests.                                                                                                                                   | Barbehenn et al., (2011)     |
| <b>LIGNIN</b>                                      | Biotic stress defence     | A complex phenolic polymer that plant cell wall rigidity and hydrophobic properties, and is an important barrier against pests and pathogens.                                                                                   | Liu et al., (2018)           |
| <b>SALICYLIC ACID</b>                              | Biotic stress             | Salicylic acid is a phytohormone involved in regulation of                                                                                                                                                                      | War et al.,                  |

defence signal plant defence, and resistance to insect pests. (2012)

153

## 154 **Materials and methods**

### 155 *Experimental set-up (Fig S1.1 in supplementary material)*

156 The study was performed at the Drie Eiken Campus, University of Antwerp, Wilrijk, Belgium  
157 (51° 09' N, 04° 24'E) in 12 sunlit, south-facing, climate-controlled chambers (details in  
158 Naudts *et al.* 2014). Three climate scenarios (four chambers per scenario) were simulated in  
159 an additive design: (1) current atmospheric CO<sub>2</sub> concentration and temperature (C); (2) future  
160 atmospheric CO<sub>2</sub> and current temperature (CO<sub>2</sub>); and (3) future atmospheric CO<sub>2</sub> and  
161 temperature (TCO<sub>2</sub>). Climate scenarios with elevated CO<sub>2</sub> had a target CO<sub>2</sub> concentration of  
162 620 μmol mol<sup>-1</sup> and future temperature chambers simulated a continuous 3 °C warming above  
163 fluctuating ambient temperatures. Climate manipulations were based on the IPCC-SRES B2-  
164 scenario prediction of moderate change for the year 2100 (IPCC, 2001).

165

166 The CO<sub>2</sub> concentration in each chamber was continuously measured and maintained at the  
167 target concentration with a CO<sub>2</sub> control group with an infrared analyser (WMA-4, PPSystems,  
168 Hitchin, UK). Air temperature and relative humidity were monitored every 0.5 h with a  
169 combined humidity–temperature sensor (Siemens QFA66, Erlangen, Germany), by averaging  
170 instantaneous readings in half-hour mean values. During the experiment, the CO<sub>2</sub>  
171 concentration was 382 ± 55 μmol mol<sup>-1</sup> (SD) in the current climate, while it was 615 ± 70  
172 μmol mol<sup>-1</sup> (SD) in the climate scenarios with future CO<sub>2</sub> concentration (CO<sub>2</sub> and TCO<sub>2</sub>). The  
173 monthly average air temperature in the C and CO<sub>2</sub> chambers was 16.2, 17.2 and 18.7 °C in  
174 June, July and August, respectively. TCO<sub>2</sub> chambers were 2.9 ± 1.0 °C (SD) warmer than  
175 current temperature chambers. Average vapour pressure deficit was 0.60 ± 0.34 and 0.64 ±  
176 0.52 kPa (SD) in the climate treatments with ambient and warmed air, respectively. Irrigation



177 mimicked the rainfall outside (Naudts et al. 2014), with monthly totals equalling 64.4, 85.1  
178 and 80.2 mm in June, July and August, respectively. Water freely drained while capillary rise  
179 was prevented by a drainage system placed below the chambers. Future climate chambers  
180 (TCO<sub>2</sub>) received the same amount of water as current climate chambers, so that any increase  
181 in water consumption would result in (aggravated) soil drought.

182

### 183 *Plant and insect communities*

184 We used two common co-occurring grassland species, *L. perenne* and *P. lanceolata*. *P.*  
185 *lanceolata* is characterized by the presence of the iridoid glycosides aucubin and catalpol.  
186 These compounds stimulate feeding and oviposition by specialist insects and can act as  
187 defence against generalist herbivores (Bowers & Puttick, 1988; Puttick & Bowers, 1988).  
188 Both plant species were sown at the end of March in a non-climate controlled greenhouse  
189 with a time lag of one week to prevent size differences at the start of the experiment (Cotrufo  
190 & Gorissen, 1997), and were watered twice a week. Four or five-week-old seedlings were  
191 transplanted into PVC containers (24 cm inner diameter and 40 cm height), filled with sandy  
192 soil (93.9% sand, 4.1% silt, 2.0% clay; pH 7.5; Kjeldahl-N 0.125 g kg<sup>-1</sup>; 2.1% C in humus).  
193 Each of the 12 chambers received 20 containers with two different compositions: (1) 10  
194 monocultures of *P. lanceolata*, and (2) 10 mixtures of both plant species in a 50:50 ratio.  
195 Each community contained 18 individuals planted in a hexagonal grid with 4.5 cm interspace.  
196 Interspecific interactions were maximized by avoiding clumping. All communities were  
197 fertilized with 10 g m<sup>-2</sup> NH<sub>4</sub>NO<sub>3</sub>, 5 g m<sup>-2</sup> P<sub>2</sub>O<sub>5</sub>, 10 g m<sup>-2</sup> K<sub>2</sub>O and micro-elements (Fe, Mn,  
198 Zn, Cu, B, Mo), given dissolved in water in two equal amounts.

199 When the plants were three months old, *P. lanceolata* was involuntarily infested with  
200 powdery mildew *Podosphaera plantaginis*. *P. plantaginis* is a biotrophic fungal pathogen  
201 which means that it feeds on living plant tissue, but does not kill the infected host. The

202 powdery mildew was found in all climate scenarios and plant compositions but not all the  
203 containers were equally affected. We took advantage of this unplanned infestation to study the  
204 impact of elevated CO<sub>2</sub> and warming on mildew infestation and the putative additive effects  
205 of mildew infestation on plant-insect herbivore interaction. Because these infections occurred  
206 post-hoc, we do not have proper controls to quantify mildew effects on metabolite  
207 composition.

208

209 The rosy apple aphid *D. plantaginea* was used as an insect herbivore. It overwinters as eggs  
210 on apple trees, the primary host plant, and migrates in spring to the obligate alternate hosts, *P.*  
211 *major* L. and *P. lanceolata* (Alford, 2014). On *Plantago* spp., they give birth to apterous  
212 (wingless) morphs that reproduce by parthenogenesis (Blommers *et al.*, 2004). *L. perenne* is  
213 not a host plant for *D. plantaginea*. The aphids were reared in small cages on *P. lanceolata*  
214 under laboratory conditions of  $22 \pm 1$  °C. They were introduced on *P. lanceolata* when the  
215 plants were 20 weeks old. At this time, two adult, apterous aphids were placed with a dry  
216 paintbrush on the apex of each *P. lanceolata* plant in monocultures and mixtures.  
217 Consequently, at the start of the infestation each container was inoculated with 36  
218 (monocultures) or 18 (mixtures) aphids. In each chamber, four monocultures of *P. lanceolata*  
219 and four mixtures were randomly chosen for aphid infestation All containers were meshed,  
220 and those not receiving aphids acted as controls. The meshes consisted of an 85-cm-tall  
221 cylinder of lightweight netting to ensure aphids did not migrate between pots. The  
222 infrastructure did not physically limit plant growth and did not cause photosynthetic stress  
223 effects ( $F_v/F_m$ , the intrinsic efficiency of PSII in controls equalled 0.84 which is an optimal  
224 value (Johnson *et al.*, 1993).

225

226 *Data collection*

227 In the fourth week after the aphid introduction we determined the mildew infestation. The  
228 degree of powdery mildew on *P. lanceolata* was categorized by a rating system: 1) healthy  
229 (no visible lesions); 2) 1% - 25% of the leaves damaged; 3) 26% - 50% of the leaves  
230 damaged; 4) 51% - 75% of the leaves damaged; 5) more than 75% of the leaves damaged. At  
231 the same time, aphid populations of four replicate communities per plant composition in each  
232 chamber were collected (totalling 4 replicate communities  $\times$  2 plant compositions  $\times$  12  
233 chambers). Aphids were brushed directly into 70% ethanol with a dry paintbrush. It was not  
234 possible to collect all the aphids because their number per container was either too high or too  
235 low (hard to find), therefore a subsample of the population per container was collected: we  
236 searched for and collected aphids for 30 minutes. The total number of aphids per community  
237 was divided by the number of *P. lanceolata* individuals in that community. At the same time,  
238 we also harvested the plants of two replicate communities per treatment in each chamber  
239 (totalling 2 replicate communities  $\times$  4 treatments  $\times$  12 chambers). Alive aboveground plant  
240 biomass in each community was separated from dead biomass by species, dried at 70 °C for  
241 48 h and weighed. These biomass values per species were likewise divided by the number of  
242 the species' individuals in the community, providing primary data for the statistical analysis.  
243 The alive biomass samples of *P. lanceolata* plants of the two harvested communities per  
244 treatment in each chamber (2 replicate communities  $\times$  4 treatments  $\times$  12 chambers) were  
245 ground in a mill. Three subsamples per community were analysed for nitrogen and carbon  
246 content using a NC element analyser (NC-2100 element analyser, Carlo Erba Instruments,  
247 Milano, Italy), which were averaged prior to data analysis.

248 A separate subsample of the milled live aboveground biomass of *P. lanceolata* of the two  
249 harvested communities per treatment in each chamber (2 replicate communities  $\times$  4 treatments  
250  $\times$  12 chambers) was taken to quantify biochemical parameters. These parameters are  
251 indicators of stress in the organism (membrane damage as malondialdehyde levels, MDA),

252 indicators of antioxidant defences i.e. total antioxidant capacity (TAC) and antioxidant  
253 molecules (tocopherols, carotenes, proline, phenols); indicators of biotic stress and defence,  
254 i.e. glycosides (catapol, aucubin), tannin, lignin and salicylic acid; and metabolites involved in  
255 plant water-deficit defence (proline, soluble sugars). We refer to Supplementary material 2 for  
256 a detailed description of the methods used to quantify these metabolites.

257

### 258 *Data analysis*

259 We focused on *P. lanceolata* because this is the host plant for the aphid and powdery mildew.  
260 In a first step we examined covariation in the metabolites responses to the three treatments  
261 (aphid infestation, climate scenario and plant composition) by using a hierarchical clustering  
262 analysis. Metabolites were normalized by Z-transformation and subjected to a hierarchical  
263 clustering analysis with an Euclidean distance metric, and visualized as a heat map using  
264 Multi Experiment Viewer (Mev) version 4.8 (Saeed *et al.*, 2003). A distance cut off of 0.3  
265 was applied. The clusters were used in the structural equation models (see below).

266 In a second step, we fitted two piecewise Structural Equation Models (SEM), which combine  
267 information from multiple separate linear models into a single causal network (Shipley,  
268 2009). The first SEM investigated the effect of aphid infestation, climate scenario, plant  
269 composition and mildew infestation on the metabolites and alive aboveground biomass of *P.*  
270 *lanceolata*. In a second SEM, we separated the metabolites of *P. lanceolata* in control pots  
271 from those with aphids. This allowed us to test the effects of the metabolites on the aphid  
272 population, as well as to quantify effects of the aphid population on these metabolites. The  
273 response of the aphid population was measured as their number at the end of the infestation.  
274 The four clusters obtained by the clustering analysis were used to divide the metabolites in  
275 separate groups and hence to avoid redundancy in the analyses. We standardized the  
276 metabolites, the alive aboveground biomass of *P. lanceolata* and the number of aphids by

277 converting to Z-scores to equalize variances. To reduce the number of mildew categories, we  
278 rearranged degree of mildew in two categories: (1) no or mild mildew infection (category 1 -  
279 2) (2) severe mildew infection (category 3 - 5).

280 Traditional SEM estimation methods assume that all variables follow a normal distribution  
281 and all observations are independent (Grace, 2006). In our analyses, we used piecewise SEM  
282 that allows fitting general linear mixed effect models that can incorporate random effects.  
283 Each mixed effects model was fitted using the “lme” function in the “nlme” package (version  
284 3.1-128) in R. For each model, we fitted a random effect of chamber. The overall path model  
285 (the SEM) was fitted using the “piecewiseSEM” package (version 1.2.1) in R (Lefcheck,  
286 2016). Goodness of fit was estimated using Shipley’s test of d-separation, which yields a  
287 Fisher’s C statistic that is Chi-squared distributed (Shipley, 2009). If the resulting P-value >  
288 0.05, then the SEM can be said to adequately reproduce the hypothesized causal network.

289 As a final confirmatory step, all data were analysed with General Linear Mixed models  
290 (GLM) in SAS (version 9.2, SAS Institute Inc., Cary, NC) (Littell *et al.*, 1996) with chamber  
291 as a random factor nested within climate scenario. Climate scenario, plant composition, aphid  
292 infestation and two-way and three-way interactions between these predictors were included as  
293 fixed factors. Because mildew infestation did not have a significant effect on biochemical  
294 plant responses, this treatment was excluded from the GLM analysis. Non-significant factors  
295 were backwards-excluded from the model. In case of significant effects, *a posteriori* means  
296 comparisons using the Tukey test, corrected for multiple comparisons, were made. Effects  
297 were considered significant at  $P \leq 0.05$ . Repeated univariate analyses are subject to error  
298 proliferations. We deliberately decided not to correct results from these analyses for multiple  
299 testing, but instead interpret them in a conservative way in congruence with the higher  
300 described grouping analyses. Results and discussion of the series of univariate analyses are  
301 therefore provided in Supplementary Material 3.

302

303

## 304 **Results**

### 305 *Hierarchical clustering analysis of metabolites*

306 The variation in primary and secondary metabolites of *P. lanceolata* was subjected to a  
307 hierarchical clustering analysis in order to understand their grouping according to their  
308 covariation in response to the imposed herbivory, climate and competition treatments. We  
309 obtained four major clusters of metabolites (clusters 1 - 4 in Fig. 1).

310 The first cluster containing metabolites consistently upregulated by the presence of aphids  
311 contains the phenol antioxidants, the lipophilic antioxidant tocopherol, the C:N ratio, tannins,  
312 and the non-structural carbohydrates soluble sugars (including glucose, fructose) and starch  
313 (Fig. 1). The second cluster contains another group of a.o., antioxidant and defence molecules  
314 that are downregulated by elevated CO<sub>2</sub> and more so by aphids in mono-cultures, i.e. the  
315 carotenoids, as well as the growth regulator, jasmonic acid, total proteins, phosphorous and  
316 lipids (Fig. 1).

317 The nutrient N which contributes solely to the third cluster, is downregulated under elevated  
318 CO<sub>2</sub>. Carbon concentration, the C:P and N:P ratio, and lignin:N were classified in the fourth  
319 cluster that is specifically upregulated by aphids in monocultures under elevated CO<sub>2</sub> (Fig. 1).  
320 Cluster 4 also contains metabolites that play a role in plant defences against herbivores, such  
321 as salicylic acid and the iridoid glycosides (catalpol and aucubin), and also contains TAC,  
322 lignin, cellulose, proline and MDA. Notably in this cluster, metabolites are strongly induced  
323 in CO<sub>2</sub> and TCO<sub>2</sub>.

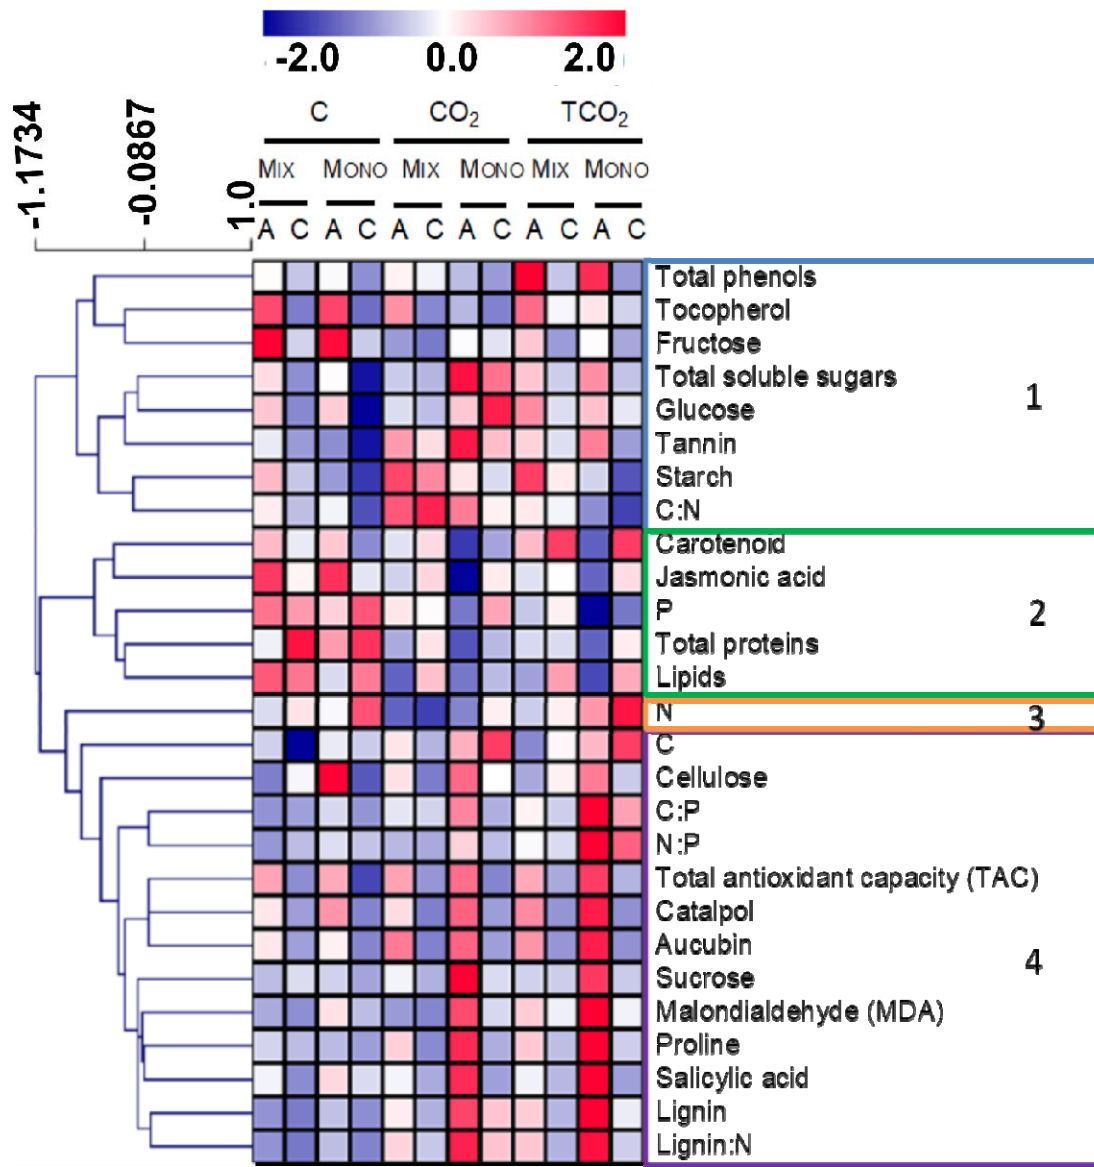

324

325 **Fig. 1** Heat map showing the metabolite levels in the leaves of *P. lanceolata*, normalized to Z-  
 326 score for each metabolite (blue-white-red heat map). Blue and red colours indicate a low and  
 327 high metabolite level, respectively. Clustering was based on the Euclidean distance for  
 328 metabolites. Labels 1-4 and colours indicate the four prominent clusters. Labels C, CO<sub>2</sub> and  
 329 TCO<sub>2</sub> indicate current climate, elevated CO<sub>2</sub> and combined warming and elevated CO<sub>2</sub>,  
 330 respectively. Plant communities consist of monocultures of *P. lanceolata* (mono) and mixtures  
 331 of *Lolium perenne* and *P. lanceolata* (mix) with (A) and without aphids (C).

332



333 *Causal changes as inferred by structural equation models and univariate analyses*

334 SEMs quantify the strength of both the direct and indirect interactions between the  
335 environmental scenarios related to climate change, herbivory and plant phenotype. The first  
336 SEM presents the effect of aphid infestation (qualitative effect), climate scenario, plant  
337 composition and mildew infestation on the chemical composition (the metabolites of *P.*  
338 *lanceolata* were subdivided into the four groups obtained from the hierarchical clustering; see  
339 Fig. 1) and the live aboveground biomass of *P. lanceolata* (Fig. 2A). The hypothesized  
340 structural relationship with climate scenario affecting mildew infection severity, and climate  
341 scenario, plant composition and aphid infestation interactively affecting metabolites and  
342 biomass adequately fits the data ( $\chi^2 = 42.53$ ,  $df = 32$ ,  $p = 0.101$ ). Fig. 2A and SEM statistics in  
343 Table S2.1 (in supplementary material 2) provide us with three insights. Firstly, TCO<sub>2</sub>  
344 increased the mildew infestation compared to C, but the mildew infestation, in turn, did not  
345 affect the metabolites and the alive aboveground biomass of *P. lanceolata*. Secondly, neither  
346 climate scenario, nor aphid infestation or plant composition had a significant impact on the  
347 live aboveground biomass of *P. lanceolata*. Univariate analyses showed that live biomass  
348 tended to be higher in CO<sub>2</sub> than C and was significantly lower in TCO<sub>2</sub> than CO<sub>2</sub>, which  
349 combined lead to similar values in TCO<sub>2</sub> and C (Fig. 3; see also supplementary material 3.1).

350

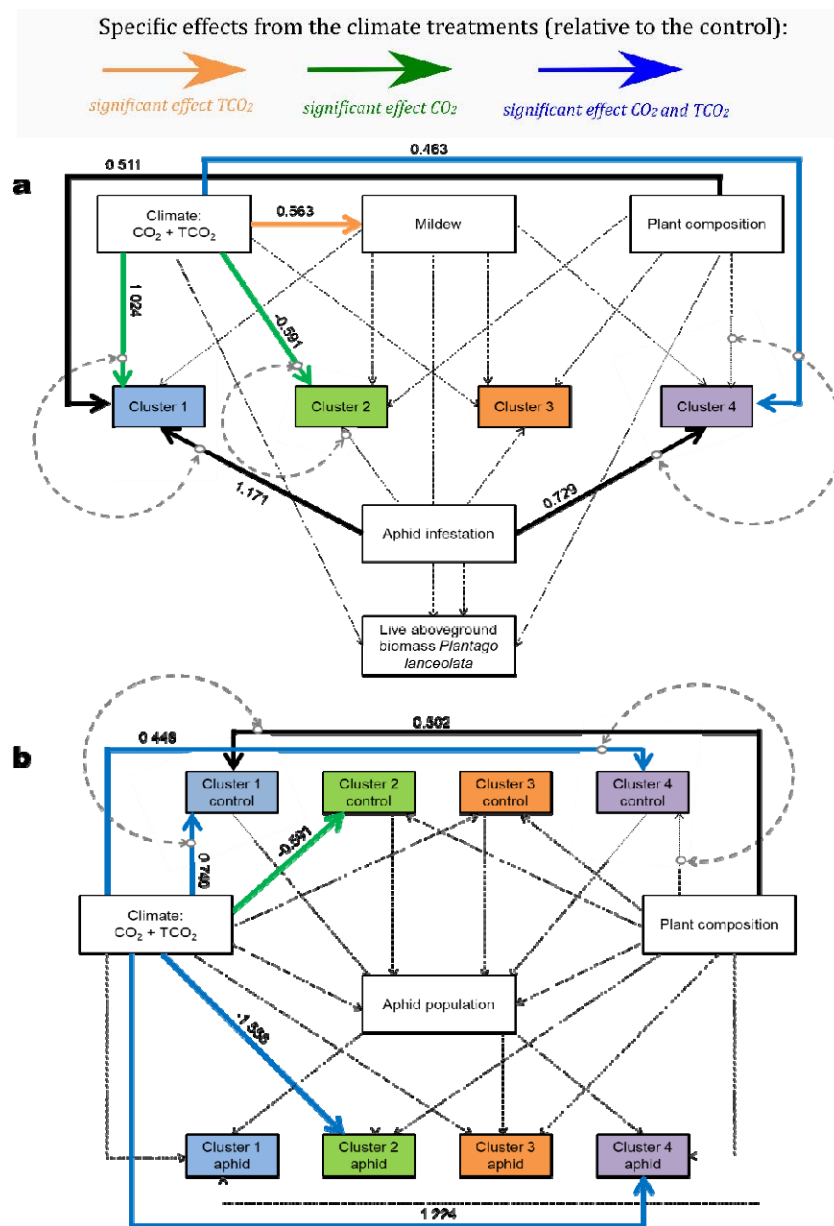

351

352 Fig. 2 (a) Structural equation model showing how climate scenario ( $CO_2$  and  $TCO_2$ ), mildew infestation, plant  
 353 composition and aphid infestation affect the chemical composition and the live aboveground biomass of *P.*  
 354 *lanceolata*. (b) Structural equation model showing how climate scenario, plant composition and chemical  
 355 composition of *P. lanceolata* affect aphid population and how aphid population, in turn, affects the  
 356 chemical composition of *P. lanceolata*. The four clusters refer to those obtained by the hierarchical clustering analysis  
 357 (see Fig. 1). Solid black, green and orange arrows represent significant relationships ( $P \leq 0.05$ ) and dashed  
 358 light grey lines significant interactions. Blue lines stand for significant effects of both  $CO_2$  and  $TCO_2$ , green lines for  
 359 significant effects of  $CO_2$  and orange lines for significant effects of  $TCO_2$ . Light grey arrows represent non-  
 360 significant relationships. Standardized path coefficients are shown next to pathways. For the effect of  $CO_2$  and  
 361  $TCO_2$ , the average path coefficients are shown. The individual path coefficients of  $CO_2$  and  $TCO_2$  can be seen in  
 362 Table S2.1 and Table S2.2 (see supplementary material section 2). Metabolites levels, live aboveground  
 363 biomass of *P. lanceolata* and number of aphids were scaled before analysis.

364

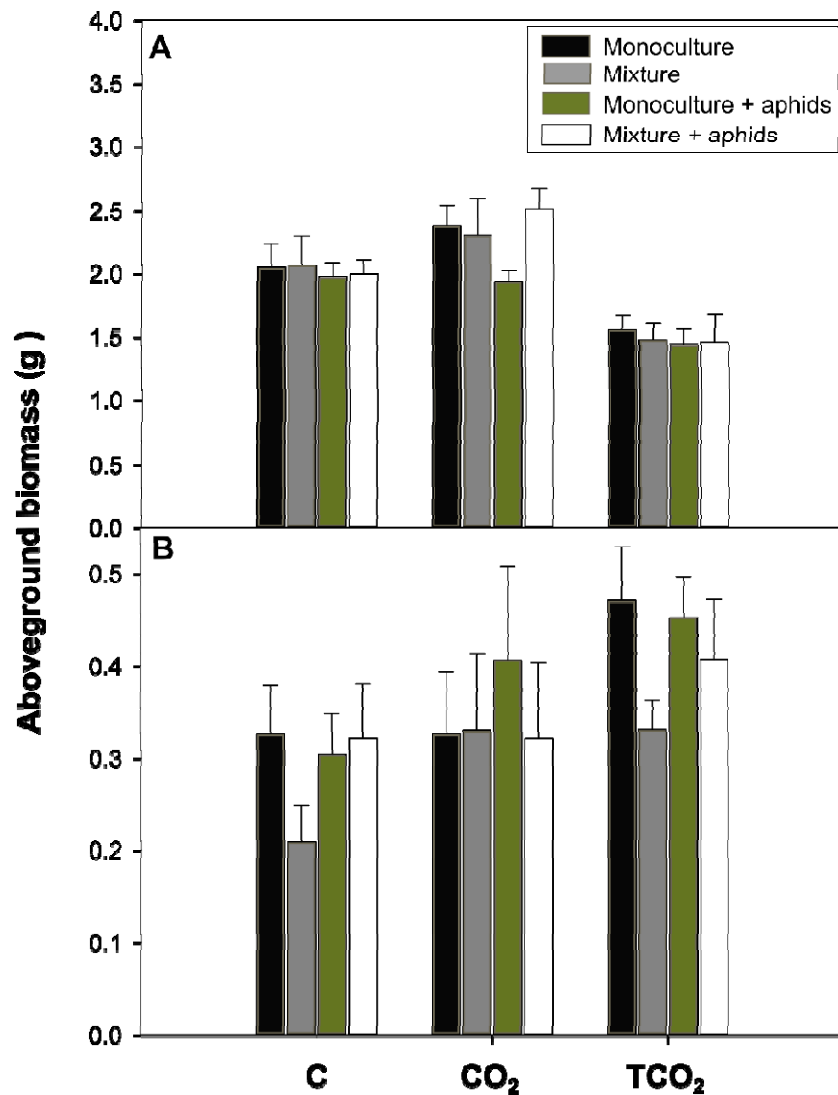

365

366 **Fig. 3** Effect of climate scenario (C, CO<sub>2</sub> and TCO<sub>2</sub>), aphid infestation and plant composition on the live (A)  
367 and dead (B) aboveground biomass of individual *P. lanceolata* plants. Bars represent means  $\pm$  SE. Plant  
368 communities consist of monocultures of *P. lanceolata* and mixtures of *Lolium perenne* and *P. lanceolata*.

369

370 Thirdly, climate scenario, aphid infestation and plant composition impacted the distinguished  
371 clusters in a different manner. We noticed a significant interaction between climate scenario  
372 and aphid infestation for metabolites associated with cluster 1 (see supplementary material  
373 3.2; Table S3.1 and Fig. S3.1). Aphid infestation increased the concentrations of the  
374 metabolites on average and pending on the environmental change scenario between 30 and  
375 100% in cluster 1 and plant composition (except for C:N ratio; Fig. 4A-B). The

376 concentrations of glucose and soluble sugars increased at elevated CO<sub>2</sub> but only in  
 377 monocultures, while TCO<sub>2</sub> did not alter the concentrations of glucose relative to the CO<sub>2</sub>  
 378 treatment but decreased the concentrations of soluble sugars in monocultures (Fig. 4C). In  
 379 general CO<sub>2</sub>, compared to C, increased the concentration of tannin while TCO<sub>2</sub> did not impose  
 380 further differences. Elevated temperature and CO<sub>2</sub> reduced the concentration of starch (except  
 381 for mixtures with aphids) and the C:N ratio compared to CO<sub>2</sub>.

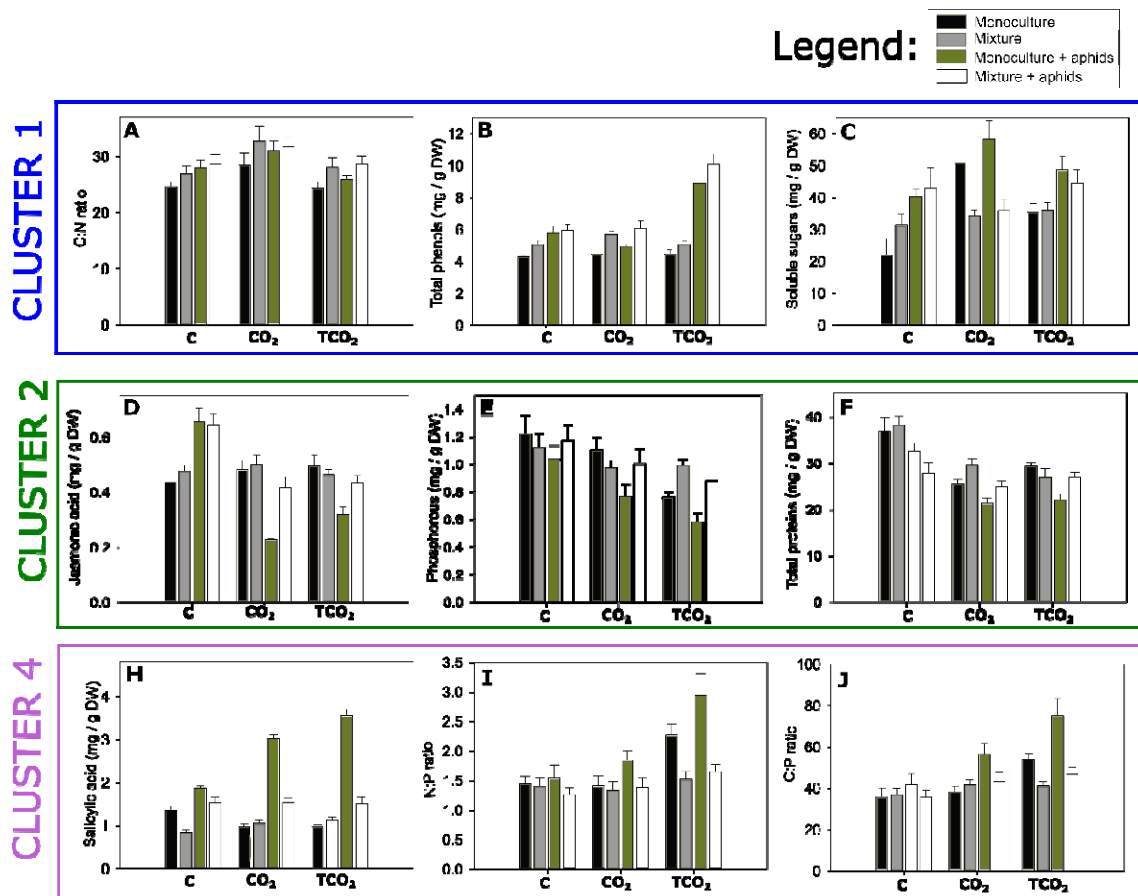

382

383 **Fig. 4** Effect of climate scenario (C, CO<sub>2</sub> and TCO<sub>2</sub>), aphid infestation and plant composition on a selection of  
 384 relevant metabolites from the four distinguished clusters. Bars represent means  $\pm$  SE. Plant communities  
 385 consist of monocultures of *P. lanceolata* and mixtures of *Lolium perenne* and *P. lanceolata*. As cluster 3 only  
 386 contained one metabolite, it is not depicted here.

387

388 Also the metabolites in cluster 2 (see supplementary material 3.2 – Table S3.2, Fig. S3.2)

389 differed according to climate scenario and aphid infestation. More specifically, univariate

390 analyses of the metabolites indicates that the concentration of jasmonic acid in C increased  
391 with aphid infestation in monocultures and mixtures while aphid infestation in CO<sub>2</sub> and TCO<sub>2</sub>  
392 decreased it in monocultures (Fig. 4D). Interspecific interactions between *P. lanceolata* and *L.*  
393 *perenne* mitigated the negative effect of aphid infestation in these climate scenarios, and  
394 hence have a neutralizing effect. Aphid infestation reduced the concentration of P in  
395 monocultures, but did not alter it in mixtures (Fig. 4E). Furthermore, also CO<sub>2</sub>, compared to  
396 C, reduced the concentration of P and the concentration was further reduced in TCO<sub>2</sub>.  
397 Furthermore, aphid infestation decreased the concentration of proteins in mixtures in C but  
398 did not alter the concentrations in monocultures and mixtures in CO<sub>2</sub> and TCO<sub>2</sub> (Fig. 4F). In  
399 general, CO<sub>2</sub> compared to C decreased the concentration of proteins irrespective of the plant  
400 composition while aphid infestation and TCO<sub>2</sub>, compared to CO<sub>2</sub>, did not alter it. The  
401 concentration of lipids decreased with aphid infestation in monocultures and mixtures in all  
402 climate scenarios (except for mixtures in C). Also, CO<sub>2</sub>, compared to C, decreased the  
403 concentration of lipids in monocultures without aphids and mixtures with aphids, but in  
404 TCO<sub>2</sub>, compared to CO<sub>2</sub>, this concentration increased again to similar levels as C in  
405 monocultures without aphids. Carotenoid concentration increased in TCO<sub>2</sub>, compared to C  
406 and CO<sub>2</sub>. Leaf nitrogen was not impacted by any of the treatments (cluster 3; see  
407 supplementary material 3.2; Table S3.3).

408 Aphid infestation, CO<sub>2</sub> and TCO<sub>2</sub> increased the metabolites in cluster 4 (see supplementary  
409 material 3.2; Table S3.4, Fig. S3.3 & Fig. S3.4) and specifically inhibited the expression of  
410 salicylic acid under the two environmental change scenarios (Fig 4G). Besides these single  
411 factor treatments effects, climate scenario, aphid infestation and plant composition also  
412 interacted with each other in affecting the metabolites in cluster 4. CO<sub>2</sub> and TCO<sub>2</sub>  
413 strengthened (salicylic acid and lignin) or induced (proline) an effect of aphid infestation but  
414 only in monocultures (Fig. 4G). TCO<sub>2</sub>, compared to CO<sub>2</sub> and C increased the N:P and the C:P

415 ratio in monocultures (Fig. 4H,I). Cellulose levels were always higher in monocultures and  
416 aphid infestation but the magnitude of increase was lower under the two climate-related  
417 environmental change scenarios relative to the current conditions (control).

418

419 The second SEM presents the effect of climate scenario, plant composition and chemical  
420 composition of *P. lanceolata* on the aphid population and whether the aphid population, in  
421 turn, altered the chemical composition of *P. lanceolata* (quantitative effect). The mildew  
422 infestation was left out of this analysis since it is a parasite of the plants, not of the aphids.  
423 The results of this SEM model show the following goodness of fit statistics:  $\chi^2 = 77.52$ ,  $df =$   
424  $80$  and  $p = 0.558$  (Table S2.2 and Fig. 2b), which provides us with two insights. Firstly,  
425 climate scenario, plant composition and the chemical composition of *P. lanceolata* did not  
426 affect the number of aphids. Secondly, the aphid population size in turn, did not change the  
427 chemical composition of *P. lanceolata*. Bringing together the findings from both SEM  
428 models, we conclude that the treatment aphid infestation altered the chemical composition of  
429 *P. lanceolata* but the number of aphids had no effect on it.

## 430 **Discussion**

431 A future climate clearly altered leaf nutritional quality and the expression of defence  
432 molecules, while aphid infestation overall impaired nutritional requirements for insect  
433 herbivores. Despite the strong metabolic changes as induced by climate-related environmental  
434 change, no feedbacks on aphid population performance and herbivory were detected. More  
435 importantly, we show that interspecific plant competition neutralizes the positive effects of  
436 elevated CO<sub>2</sub> on the production of defence molecules in *P. lanceolata*. Induced effects of  
437 climate-related environmental change on plant performance can thus be altered and even  
438 nullified by competitive and food web interactions. We first discuss the general herbivore-  
439 induced responses followed by an in-depth discussion of their dependency on the imposed  
440 climate and competition treatments.

441

### 442 ***Herbivore-induced responses***

443 Our experiment, as conducted under unique semi-natural conditions confirmed in first  
444 instance findings that aphid infestation reduces N, P, total proteins and lipids in *P. lanceolata*  
445 leaves, thereby impairing nutritional requirements of insect herbivores (Schoonhoven *et al.*,  
446 2005). In contrast to previous research (Walling, 2000), however, aphid infestation promoted  
447 the salicylic acid and jasmonic acid pathway (Kuśnierczyk *et al.*, 2011; Morkunas & Gabryś,  
448 2011) as parallelized by the increased production of catalpol, aucubin, tannin, lignin and  
449 cellulose.

450

451 Aphid herbivory increased oxidative stress in plants as well (Wu & Baldwin, 2010). We  
452 assessed the induction of oxidative stress by measuring MDA, which aphid herbivory  
453 enhanced considerably. A common defence response of plants against oxidative stress

454 includes the increase of antioxidant metabolites. Indeed, TAC and the well-known antioxidant  
455 molecules phenols and tocopherols increased due to aphid herbivory. Moreover, *P. lanceolata*  
456 responded to herbivory by increasing soluble sugars. At higher concentrations, also sugars can  
457 act as antioxidants and may play a signalling role in regulating stress and defence responses  
458 (Gómez-Ariza *et al.*, 2007, Peshev *et al.*, 2013). The induced resistance against oxidative  
459 stress associated with aphid feeding appeared sufficiently effective to constrain biomass loss  
460 from herbivory.

461

### 462 *Climate dependency of the plant phenotype*

463 Elevated CO<sub>2</sub> and temperature did not change the impact of herbivory on *P. lanceolata*  
464 biomass. This implies that warming and CO<sub>2</sub> did not affect the net interaction strength  
465 between plants and herbivores under semi-natural conditions. In contrast to earlier studies  
466 (Van De Velde *et al.*, 2016), our experiment allows a profound analysis of the underlying  
467 biochemical processes.

468 First, we found elevated CO<sub>2</sub> to increase starch and soluble sugars (in monocultures) and to  
469 lower leaf proteins, hereby increasing the C:N ratio. In addition, elevated CO<sub>2</sub> reduced P and  
470 consequently increased the C:P ratio (in monocultures), thereby reducing the plant's nutritive  
471 value to herbivores (Huberty & Denno, 2006; Lincoln *et al.*, 1986; Mattson, 1980;  
472 Schoonhoven *et al.*, 2005). We demonstrate here that these effects can be countered when  
473 elevated CO<sub>2</sub> is accompanied with a temperature rise. This contradicts findings based on a  
474 limited set of primary metabolites (Murray *et al.* 2013), but urges to apply broader phenomic  
475 approaches to fully understand plant responses to climate change.

476



477 Second, elevated CO<sub>2</sub> increased the defence molecules lignin and tannin, especially under  
478 aphid infestation. The induction of plant chemical defences (Bidart-Bouzat & Imeh-Nathaniel,  
479 2008; Bidart-Bouzat *et al.*, 2005) is thus not consistent for all defence molecules, and are  
480 consequently anticipated to render prediction on future plant-insect herbivore interaction  
481 highly complex (Agrawal, 1999). In our study, the higher C:N ratio reflected higher lignin  
482 and tannin levels. While there is a consensus that the carbon-nutrient-balance hypothesis fails  
483 as predictive framework (Hamilton *et al.*, 2001; Lindroth, 2012), alternative hypotheses have  
484 been proposed stating that resource utilization for chemical defence is linked with  
485 photosynthesis, hormone regulation and the control of gene expression (Zavala *et al.*, 2017).  
486 We here provide evidence for this alternative mechanism as we found CO<sub>2</sub> to alter  
487 phytohormones (i.e., salicylic acid and jasmonic acid) that play an important role in  
488 promoting compounds responsible for herbivore defence (Wu & Baldwin, 2010). Since no  
489 further quantitative changes were observed under higher temperature, we can confidently  
490 conclude that climate-change-induced changes in metabolic profiles are more due to enhanced  
491 CO<sub>2</sub> than to temperature increases acting in parallel.

492

### 493 ***Competition: a biotic interaction mediating climate-induced effects***

494 The presence and identity of neighbouring plants can influence the quality of the host plant by  
495 altering primary and secondary chemistry (Barton & Bowers, 2006; Broz *et al.*, 2010, Lankau,  
496 2012; Thorpe *et al.*, 2011). We provide evidence that these biotic interactions are additionally  
497 able to alter climate-induced phenomic changes, and by that further impacting ecological  
498 interactions under climate-related environmental change. Energetic growth-defence-trade-offs  
499 have usually been attributed to these competition effects (Herms & Mattson, 1992), but recent  
500 studies demonstrated the role of light limitation for plant defence downregulation (Ballaré,  
501 2014; Campos *et al.*, 2016). More specifically, a reduced red to far-red ratio downregulates

502 defences by a simultaneous inhibition of the jasmonic acid and the salicylic acid pathway  
503 (Wit *et al.*, 2013). The lower levels of defence molecules and salicylic acid in *P. lanceolata*  
504 support this hypothesis. Competition did, however, also counter the CO<sub>2</sub>-induced changes in  
505 primary and secondary metabolites, as well as those induced by herbivores, rendering an  
506 understanding of plant defences far from trivial (de Vries *et al.*, 2017). It is well-understood  
507 that bottom-up effects from plant quality to herbivore abundance cannot be generalized across  
508 the feeding guilds (Bezemer & Jones, 1998; Robinson *et al.*, 2012; Stiling & Cornelissen,  
509 2007), but phloem feeders such as aphids were at least expected to be facilitated. Despite the  
510 complex, high-dimensional changes in plant metabolomes under competition and climate  
511 change, the overall effects on aphid population sizes were small to non-existent.

512

513 We here thus demonstrate that the joint action of atmospheric factors associated with climate  
514 change and biotic interactions are able to induce pronounced changes in plant metabolomes  
515 and biomass, but that translation of these biochemical changes towards ecological responses  
516 appears non-trivial. Climate-change-imposed changes are shown to be completely neutralized  
517 when common biotic interactions are taken into consideration. Plant-plant interactions thus  
518 add a layer of complexity in mechanistic studies of climate change effects on plant-enemy  
519 ecological interaction.

520 **Supplementary data:**

521 **Supplementary material 1:** Schematic representation of the experimental setup

522 **Supplementary material 2:** Metabolite quantification methods and SEM statistics

523 **Supplementary material 3:** Results from the univariate GLM analyses (statistics and  
524 figures)

525

526 **Acknowledgements**

527 H. Van De Velde is a Research Assistant of the Fund for Scientific Research-Flanders  
528 (FWO). D. Bonte was funded by the FWO research network W0.003.16N “An eco-  
529 evolutionary network of biotic interactions”. We thank the Earth and Life Institute (Université  
530 Catholique de Louvain) for providing *Dysaphis plantaginea*, N. Calluy and M. Wellens for  
531 technical assistance, colleagues for field assistance and Martijn Bezemer and Martijn  
532 Vandegehuchte for helpful comments on an earlier version of this manuscript.

533

534 **References**

- 535 Agrawal, AA. (1999). Induced responses to herbivory in wild radish: effects on several herbivores and  
536 plant fitness. *Ecology*, **80**, 1713-1723.
- 537 Agrios, G.N. (2005). *Plant pathology*, Amsterdam, Netherland, Elsevier Academic Press.
- 538 Alford, D.V. (2014). *Pests of fruit crops: a colour handbook*, London, U.K, Manson Publishing.
- 539 Bale, J.S., Masters G.J., Hodkinson I.D. et al.. (2002). Herbivory in global climate change research:  
540 direct effects of rising temperature on insect herbivores. *Global change biology*, **8**, 1-16.
- 541 Ballaré, CL. (2014). Light regulation of plant defense. *Annual review of plant biology*, **65**, 335-363.
- 542 Ballaré ,C.L., Scopel, A.L., Sanchez, R.A. (1990). Far-red radiation reflected from adjacent leaves: an  
543 early signal of competition in plant canopies. *Science*, **247**, 329.
- 544 Bartley,G.E., Scolnik,P.A.(1995).Plant carotenoids:Pigments for photoprotection, visualattraction, and  
545 human health. *Plant and Cell*, **7**, 1027-1038.
- 546 Barton, K.E., Bowers, M.D. (2006). Neighbor species differentially alter resistance phenotypes in  
547 *Plantago*. *Oecologia*, **150**, 442-452.
- 548 Bauerfeind, S.S., Fischer, K. (2013). Increased temperature reduces herbivore host-plant quality.  
549 *Global change biology*, **19**, 3272-3282.
- 550 Bezemer, T.M., Jones, T.H. (1998). Plant-insect herbivore interactions in elevated atmospheric CO<sub>2</sub>:  
551 quantitative analyses and guild effects. *Oikos*, **82**, 212-222.
- 552 Bidart-Bouzat, M.G., Imeh-Nathaniel, A. (2008). Global change effects on plant chemical defenses  
553 against insect herbivores. *Journal of Integrative Plant Biology*, **50**, 1339-1354.
- 554 Bidart-Bouzat, M.G., Mithen, R., Berenbaum, M.R. (2005). Elevated CO<sub>2</sub> influences herbivory-  
555 induced defense responses of *Arabidopsis thaliana*. *Oecologia*, **145**, 415-424.

- 556 Blokhina O., Virolainen E., Fagerstedt K.V. (2003) Antioxidants, oxidative damage and oxygen  
557 deprivation stress: a review, *Annales of Botany*, **91**, 179–194.
- 558 Blommers, L.H.M., Helsen, H.H.M., Shao, H.B., Liang, Z.S., Shao, M.A. (2006). Osmotic regulation  
559 of 10 wheat (*Triticum aestivum* L.) genotypes at soil water deficits. *Biointerphases*, **47**, 132-139.
- 560 Bowers, M.D., Puttick, G.M.. (1988). Response of generalist and specialist insects to qualitative  
561 allelochemical variation. *Journal of chemical ecology*, **14**, 319-334.
- 562 Bowers, M. D. (1991). Iridoid glycosides. In:G. A. Rosenthal and M. R. Berenbaum (eds.).  
563 *Herbivores: Their Interactions with Secondary Plant Metabolites*, 297–325. Academic Press, New  
564 York.
- 565 Broz, A.K., Broeckling, C.D., De-La-Peña, C. et al.. (2010). Plant neighbor identity influences plant  
566 biochemistry and physiology related to defense. *BMC Plant Biology*, **10**, 1.
- 567 Bryant, J.P., Chapin Iii, F.S., Klein, D.R. (1983). Carbon/nutrient balance of boreal plants in relation  
568 to vertebrate herbivory. *Oikos* **78**, 357-368.
- 569 Campos, M.L., Yoshida, Y., Major, I.T., et al.. (2016). Rewiring of jasmonate and phytochrome B  
570 signalling uncouples plant growth-defense tradeoffs. *Nature Communications*, **7**, 12570.
- 571 Cornelissen, T. (2011). Climate change and its effects on terrestrial insects and herbivory patterns.  
572 *Neotropical Entomology*, **40**, 155-163.
- 573 Cotrufo, M.F., Gorissen, A. (1997). Elevated CO<sub>2</sub> enhances below-ground C allocation in three  
574 perennial grass species at different levels of N availability. *New Phytologist*, **137**, 421-431.
- 575 Darrow, K, Bowers, M.D. (1999). Effects of herbivore damage and nutrient level on induction of  
576 iridoid glycosides in *Plantago lanceolata*. *Journal of chemical ecology*, **25**, 1427-1440.
- 577 Das, K., Roychoudhury, A. (2014) Reactive oxygen species (ROS) and response of antioxidants as  
578 ROS-scavengers during environmental stress in plants. *Frontiers in Environmental Sciences*, **2**, 00053

- 579 De Boeck, H.J, Lemmens, C., Zavalloni, C. et al.. 2008. Biomass production in experimental  
580 grasslands of different species richness during three years of climate warming. *Biogeosciences*, **5**, 585-  
581 594.
- 582 De Valpine, P., Harte, J.. (2001). Plant responses to experimental warming in a montane meadow.  
583 *Ecology*, **82**, 637-648.
- 584 De Vries, J., Evers, J.B., Poelman, E.H. (2017). Dynamic plant–plant–herbivore interactions govern  
585 plant growth–defence integration. *Trends in plant science*, **22**, 329 - 337.
- 586 Dieleman, W.I., Vicca S., Dijkstra, F.A. et al.. (2012). Simple additive effects are rare: a quantitative  
587 review of plant biomass and soil process responses to combined manipulations of CO<sub>2</sub> and  
588 temperature. *Global change biology*, **18**, 2681-2693.
- 589 Gómez-Ariza, J., Campo, S., Rufat, M., Estopà M, Messeguer, J., Segundo, B.S., Coca, M..(2007).  
590 Sucrose-mediated priming of plant defense responses and broad-spectrum disease resistance by  
591 overexpression of the maize pathogenesis-related PRms protein in rice plants. *Molecular Plant-  
592 Microbe Interactions*, **20**, 832-842.
- 593 Grace, J.B. (2006). *Structural equation modeling and natural systems*, Cambridge, UK, Cambridge  
594 University Press.
- 595 Hamilton, J., Zangerl, A., Delucia, E., Berenbaum, M. (2001). The carbon–nutrient balance  
596 hypothesis: its rise and fall. *Ecology letters*, **4**, 86-95.
- 597 Herms, D.A., Mattson, W.J. (1992). The dilemma of plants: to grow or defend. *Quarterly Review of  
598 Biology*, **67**, 283-335.
- 599 Huberty, A.F., Denno, R.F. (2006). Consequences of nitrogen and phosphorus limitation for the  
600 performance of two planthoppers with divergent life-history strategies. *Oecologia*, **149**, 444-455.
- 601 Hunter, M.D. (2001). Effects of elevated atmospheric carbon dioxide on insect-plant interactions.  
602 *Agricultural and Forest Entomology*, **3**, 153-159.

- 603 IPCC. (2001). Climate Change: the scientific basis. Contribution of Working Group I to the third  
604 assessment report of the Intergovernmental Panel on Climate Change. . eds Houghton J, Ding Y,  
605 Griggs D, Noguer M, Van Der Linden P, Dai X, Maskell K, Ca. J., Cambridge, UK and New York,  
606 NY, USA, Cambridge University Press.
- 607 Jamieson, M.A., Schwartzberg, E.G., Raffa, K.F., Reich, P.B., Lindroth, R.L. (2015). Experimental  
608 climate warming alters aspen and birch phytochemistry and performance traits for an outbreak insect  
609 herbivore. *Global Change Biology*, **21**, 2698-2710.
- 610 Johnson, G., Young, A., Scholes, J., Horton, P. (1993). The dissipation of excess excitation energy in  
611 British plant species. *Plant, Cell & Environment*, **16**, 673-679.
- 612 Kaloshian, I, Walling, L.L. (2005). Hemipterans as plant pathogens. *Annu. Rev. Phytopathol.*, **43**,  
613 491-521.
- 614 Kuśnierczyk, A., Tran, D.H., Winge, P., Jørstad, T.S., Reese, J.C., Troczyńska, J., Bones, A.M.  
615 (2011). Testing the importance of jasmonate signalling in induction of plant defences upon cabbage  
616 aphid. *Brevicoryne brassicae*. attack. *BMC genomics*, **12**, 423.
- 617 Lankau, R.A. (2012). Coevolution between invasive and native plants driven by chemical competition  
618 and soil biota. *Proceedings of the National Academy of Sciences*, **109**, 11240-11245.
- 619 Lefcheck, J.S. (2016). piecewiseSEM: Piecewise structural equation modelling in R for ecology,  
620 evolution, and systematics. *Methods in Ecology and Evolution*, **7**, 573-579.
- 621 Lilley, J., Bolger, T., Gifford, R. (2001). Productivity of *Trifolium subterraneum* and *Phalaris aquatica*  
622 under warmer, high CO<sub>2</sub> conditions. *New Phytologist*, **150**, 371-383.
- 623 Lincoln, D., Couvet, D., Sionit, N. (1986). Response of an insect herbivore to host plants grown in  
624 carbon dioxide enriched atmospheres. *Oecologia*, **69**, 556-560.
- 625 Lincoln, D.E., Fajer, E.D., Johnson, R.H. (1993). Plant insect herbivore interactions in elevated CO<sub>2</sub>  
626 environments. *Trends in Ecology & Evolution*, **8**, 64-68.

- 627 Lindroth, R.L. (2012). Atmospheric change, plant secondary metabolites and ecological interactions.  
628 In: The ecology of plant secondary metabolites: from genes to global processes.. eds Iason G, Dicke  
629 M, Hartley S. pp Page. Cambridge, UK, Cambridge University Press.
- 630 Littell, R.C., Milliken, G.A., Stroup, W.W., Wolfinger, R.D. (1996). SAS system for mixed models,  
631 Cary, North Carolina, SAS institute Inc.
- 632 Liu, Q., Luo, L., Zheng, L. (2018). Lignins: Biosynthesis and Biological Functions in  
633 Plants. International journal of molecular sciences, **19**, 19020335
- 634 Long, S.P, Ainsworth, E.A., Rogers, A., Ort, D.R. (2004). Rising atmospheric carbon dioxide: plants  
635 FACE the future. Annual review of plant biology, **55**, 591-628.
- 636 Mattson, W.J. (1980). Herbivory in relation to plant nitrogen content. Annual review of ecology and  
637 systematics, **11**, 119-161.
- 638 Meisner, M.H, Harmon, J.P., Ives, A.R. (2014). Temperature effects on long-term population  
639 dynamics in a parasitoid-host system. Ecological Monographs, **84**, 457-476.
- 640 Mikkelsen, B.L., Jørgensen, R.B., Lyngkjær, M.F. (2015). Complex interplay of future climate levels  
641 of CO<sub>2</sub>, ozone and temperature on susceptibility to fungal diseases in barley. Plant Pathology, **64**,  
642 319-327.
- 643 Morkunas, I, Gabryś, B. (2011). Phytohormonal signaling in plant responses to aphid feeding. Acta  
644 Physiologiae Plantarum, **33**, 2057-2073.
- 645 Murray, T., Ellsworth, D., Tissue, D., Riegler, M. (2013). Interactive direct and plant-mediated effects  
646 of elevated atmospheric [CO<sub>2</sub>] and temperature on a eucalypt-feeding insect herbivore. Global change  
647 biology, **19**, 1407-1416.
- 648 Naudts, K, Van Den Berge, J., Farfan, E. et al.. 2014. Future climate alleviates stress impact on  
649 grassland productivity through altered antioxidant capacity. Environmental and Experimental Botany,  
650 **99**, 150-158.



- 651 Peshev, D., Vergauwen, R., Moglia, A., Hideg, É., Van Den Ende, W. (2013). Towards understanding  
652 vacuolar antioxidant mechanisms: a role for fructans? *Journal of Experimental Botany*, **64**, 1025-1038.
- 653 Puttick, G.M., Bowers, M.D. (1988). Effect of qualitative and quantitative variation in allelochemicals  
654 on a generalist insect: iridoid glycosides and the southern armyworm. *Journal of chemical ecology*, **14**,  
655 335-351.
- 656 Rawson, H. (1992). Plant responses to temperature under conditions of elevated CO<sub>2</sub>. *Australian*  
657 *Journal of botany*, **40**, 473-490.
- 658 Robinson, E.A, Ryan G.D., Newman, J.A. (2012). A meta-analytical review of the effects of elevated  
659 CO<sub>2</sub> on plant–arthropod interactions highlights the importance of interacting environmental and  
660 biological variables. *New Phytologist*, **194**, 321-336.
- 661 Ryan, G.D., Sylvester, E.V., Shelp, B.J., Newman, J.A. (2015). Towards an understanding of how  
662 phloem amino acid composition shapes elevated CO<sub>2</sub>-induced changes in aphid population dynamics.  
663 *Ecological Entomology*, **40**, 247-257.
- 664 Saeed, A., Sharov, V., White, J. et al.. (2003). TM4: a free, open-source system for microarray data  
665 management and analysis. *Biotechniques*, **34**, 374.
- 666 Schoonhoven, L.M., Van Loon, J.J., Dicke, M. (2005). *Insect-plant biology*, Oxford, Oxford  
667 University Press.
- 668 Shipley, B. (2009). Confirmatory path analysis in a generalized multilevel context. *Ecology*, **90**, 363-  
669 368.
- 670 Stiling, P, Cornelissen, T. (2007). How does elevated carbon dioxide. CO<sub>2</sub>. affect plant-herbivore  
671 interactions? A field experiment and meta-analysis of CO<sub>2</sub>-mediated changes on plant chemistry and  
672 herbivore performance. *Global change biology*, **13**, 1823-1842.
- 673 Szabados, L., Savoure, A. (2010). Proline: a multifunctional amino acid. *Trends in Plant Science*, **15**,  
674 89–97.

- 675 Thomas, M.B., Blanford, S. (2003). Thermal biology in insect-parasite interactions. *Trends in Ecology*  
676 & *Evolution*, **18**, 344-350.
- 677 Thorpe, A.S., Aschehoug, E.T., Atwater, D.Z., Callaway, R.M. (2011). Interactions among plants and  
678 evolution. *Journal of Ecology*, **99**, 729-740.
- 679 Vaal, F. (2004). Life history data of the rosy apple aphid *Dysaphis plantaginea*. Pass.). Homopt.,  
680 Aphididae. on plantain and as migrant to apple. *Journal of Pest Science*, **77**, 155-163.
- 681 Van De Velde, H., Nijs, I., Bonte, D. (2016). Warming affects different components of plant–  
682 herbivore interaction in a simplified community but not net interaction strength. *Oikos*, **126**, 285-295.
- 683 Walling, L.L. (2000). The myriad plant responses to herbivores. *Journal of Plant Growth Regulation*,  
684 **19**, 195-216.
- 685 War A. R., Paulraj M. G., Ahmad T., Buhroo A. A., Hussain B., Ignacimuthu S . (2012). Mechanisms  
686 of plant defense against insect herbivores. *Plant Signaling and Behaviour*, **7**, 1306–1320.
- 687 Williams, A.L., Wills, K.E., Janes, J.K., Vander Schoor, J.K., Newton, P.C., Hovenden, M.J. (2007).  
688 Warming and free-air CO<sub>2</sub> enrichment alter demographics in four co-occurring grassland species.  
689 *New Phytologist*, **176**, 365-374.
- 690 Wit, M., Spoel, S.H., Sanchez-Perez, G.F., Gommers, C.M., Pieterse, C.M., Voosenek, L.A., Pierik, R.  
691 (2013). Perception of low red: far-red ratio compromises both salicylic acid-and jasmonic  
692 acid-dependent pathogen defences in *Arabidopsis*. *The Plant Journal*, **75**, 90-103.
- 693 Wu, J., Baldwin, I.T. (2010). New insights into plant responses to the attack from insect herbivores.  
694 *Annual review of genetics*, **44**, 1-24.
- 695 Zavala, J., Gog, L., Giacometti, R. (2017). Anthropogenic increase in carbon dioxide modifies plant–  
696 insect interactions. *Annals of Applied Biology*, **170**, 68-77.

- 697 Zavala, J.A., Nability, P.D., Delucia, E.H. (2013). An emerging understanding of mechanisms  
698 governing insect herbivory under elevated CO<sub>2</sub>. *Annual review of entomology*, **58**, 79-97.
- 699 Zinta, G., Abdelgawad, H., Peshev, D., Weedon, J.T., Van den Ende, W., Nijs, I., Janssens, I.A.,  
700 Beemster, G.T.S., Asard, H. (2018). Dynamics of metabolic responses to periods of combined heat  
701 and drought in *Arabidopsis thaliana* under ambient and elevated atmospheric CO<sub>2</sub>. *Journal of*  
702 *Experimental Botany*, **69**, 2159–2170
- 703 Zvereva, E.L., Kozlov, M.V. (2006). Consequences of simultaneous elevation of carbon dioxide and  
704 temperature for plant-herbivore interactions: a metaanalysis. *Global change biology*, **12**, 27-41.
- 705

706 **Figure legends**

707

708 **Fig. 1** Heat map showing the metabolite levels in the leaves of *P. lanceolata*, normalized to Z-  
709 score for each metabolite (blue-white-red heat map). Blue and red colours indicate a low and  
710 high metabolite level, respectively. Clustering was based on the Euclidean distance for  
711 metabolites. Labels 1-4 and colours indicate the four prominent clusters. Labels C, CO<sub>2</sub> and  
712 TCO<sub>2</sub> indicate current climate, elevated CO<sub>2</sub> and combined warming and elevated CO<sub>2</sub>,  
713 respectively. Plant communities consist of monocultures of *P. lanceolata* (mono) and  
714 mixtures of *Lolium perenne* and *P. lanceolata* (mix) with (A) and without aphids (C).

715 **Fig. 2** (a) Structural equation model showing how climate scenario (CO<sub>2</sub> and TCO<sub>2</sub>), mildew  
716 infestation, plant composition and aphid infestation affect the chemical composition and the  
717 live aboveground biomass of *P. lanceolata*. (b) Structural equation model showing how  
718 climate scenario, plant composition and chemical composition of *P. lanceolata* affect aphid  
719 population and how aphid population, in turn, affects the chemical composition of *P.*  
720 *lanceolata*. The four clusters refer to those obtained by the hierarchical clustering analysis  
721 (see Fig. 1).

722 Solid black, green and orange arrows represent significant relationships ( $P \leq 0.05$ ) and dashed  
723 grey lines significant interactions. Blue lines stand for significant effects of both CO<sub>2</sub> and  
724 TCO<sub>2</sub>, green lines for significant effects of CO<sub>2</sub> and orange lines for significant effects of  
725 TCO<sub>2</sub>. Light grey arrows represent non-significant relationships. Standardized path  
726 coefficients are shown next to pathways. For the effect of CO<sub>2</sub> and TCO<sub>2</sub>, the average path  
727 coefficients are shown. The individual path coefficients of CO<sub>2</sub> and TCO<sub>2</sub> can be seen in  
728 Table S1 and Table S2 (see supplementary material section 2). Metabolites levels, live  
729 aboveground biomass of *P. lanceolata* and number of aphids were scaled before analysis.

730 **Fig. 3** Effect of climate scenario (C, CO<sub>2</sub> and TCO<sub>2</sub>), aphid infestation and plant composition  
731 on the live (A) and dead (B) aboveground biomass of *Plantago lanceolata*. Bars represent  
732 means  $\pm$  SE. Plant communities consist of monocultures of *P. lanceolata* and mixtures of  
733 *Lolium perenne* and *P. lanceolata*.

734 **Fig. 4** Effect of climate scenario (C, CO<sub>2</sub> and TCO<sub>2</sub>), aphid infestation and plant composition  
735 on the on a selection of relevant metabolites from the four distinguished clusters. Bars  
736 represent means  $\pm$  SE. Plant communities consist of monocultures of *P. lanceolata* and  
737 mixtures of *Lolium perenne* and *P. lanceolata*.
